# Supplementary material for: Improvement of the Electrode–Electrolyte Interface Using Crosslinked Carbonate-Based Copolymers for Solid-State Lithium-Ion Batteries
Source: MDPI journal article supplement (doi:10.3390/batteries8120273), 2022-12-05
Supplement: s1 [file s1]

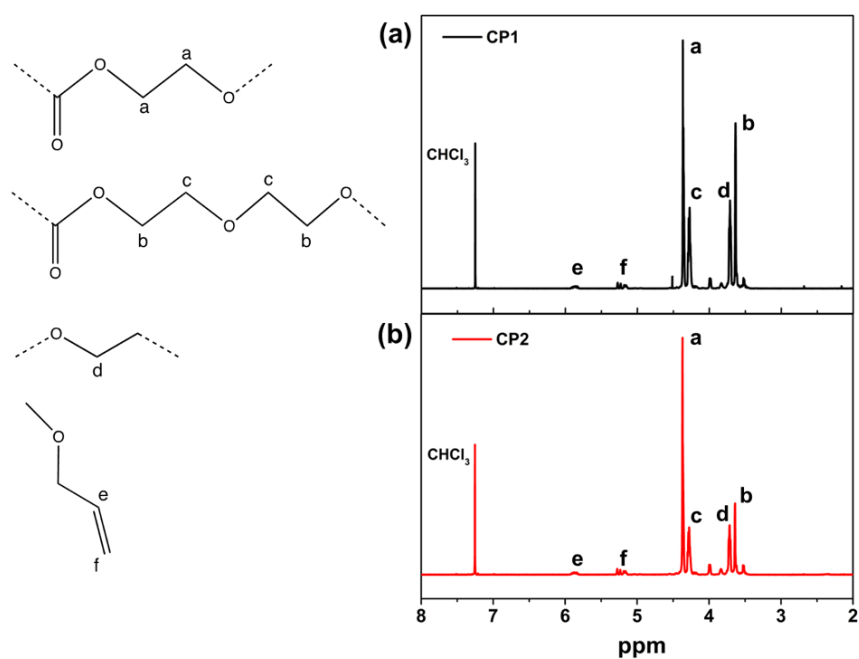

**Figure S1.**  $^1\text{H}$  NMR spectra of synthesized starting copolymers for (a) CP 1 and (b) CP2, respectively.

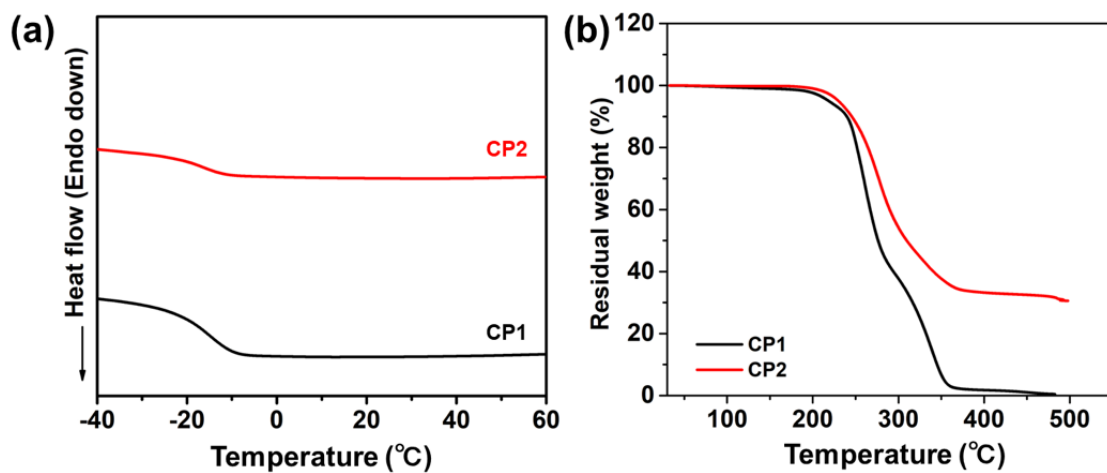

**Figure S2.** (a) DSC curves and (b) TGA thermograms of CP1 and CP2.

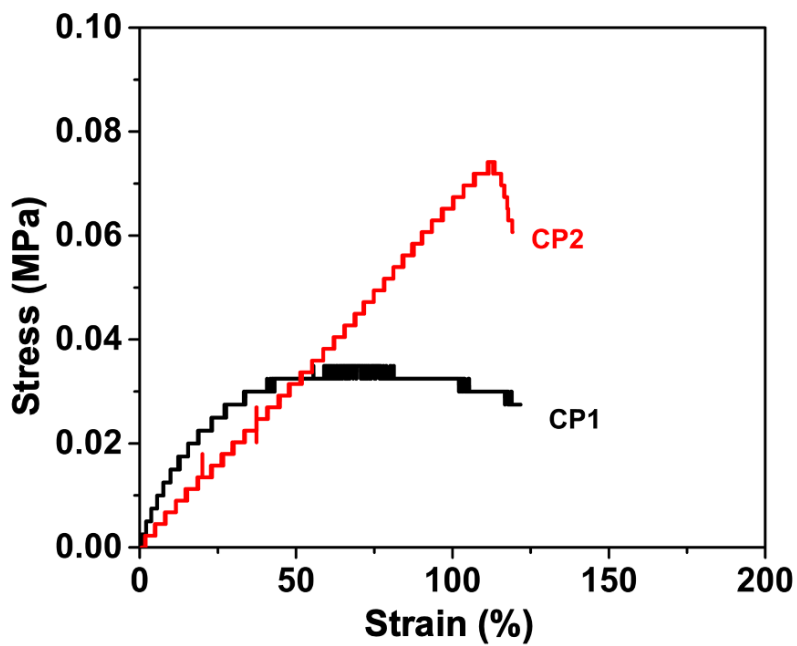

Figure S3. Tensile stress-strain curves of CP1 and CP2.

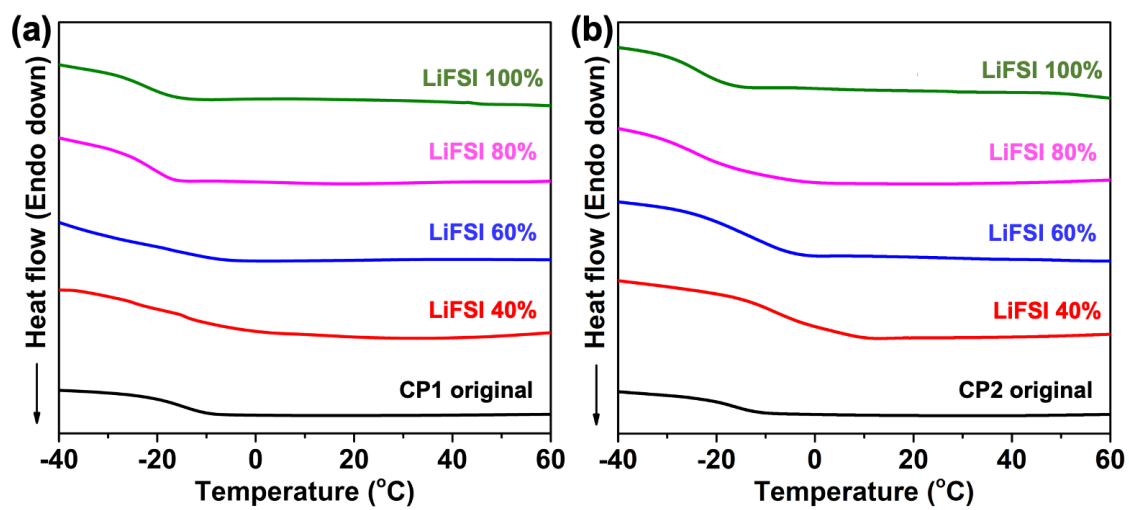

Figure S4. DSC curves of (a) CP1 and (b) CP2 with different concentrations.

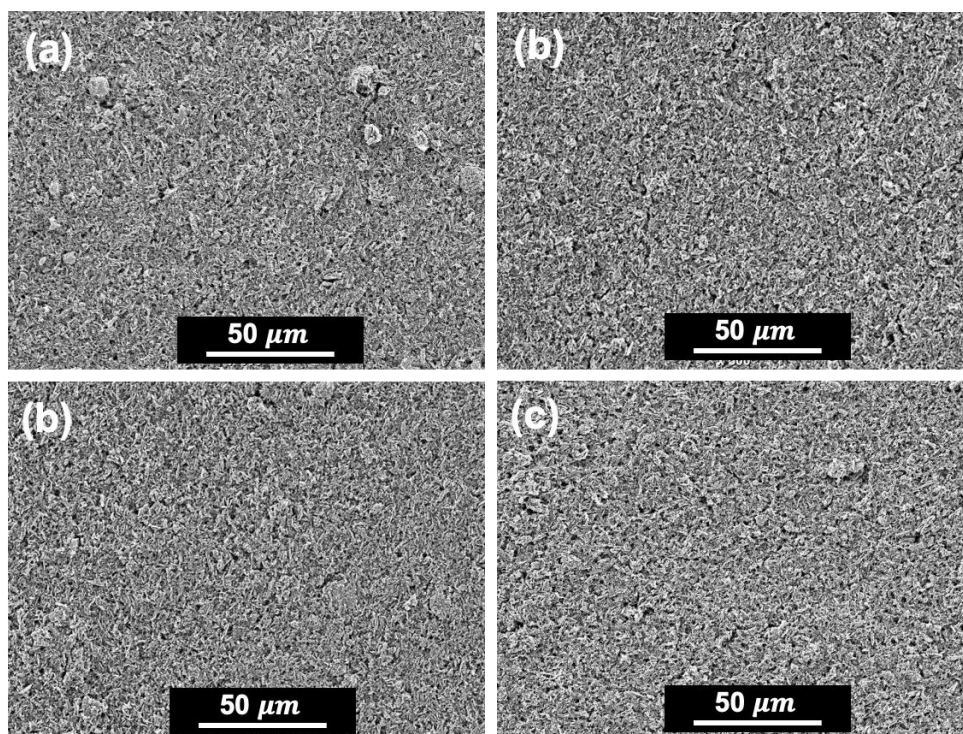

**Figure S5.** SEM images of (a) CP2:PVDF 0:100, (b) CP2:PVDF 20:80, (c) CP2:PVDF 50:50, and (d) CP2:PVDF 80:20 cathode, respectively.

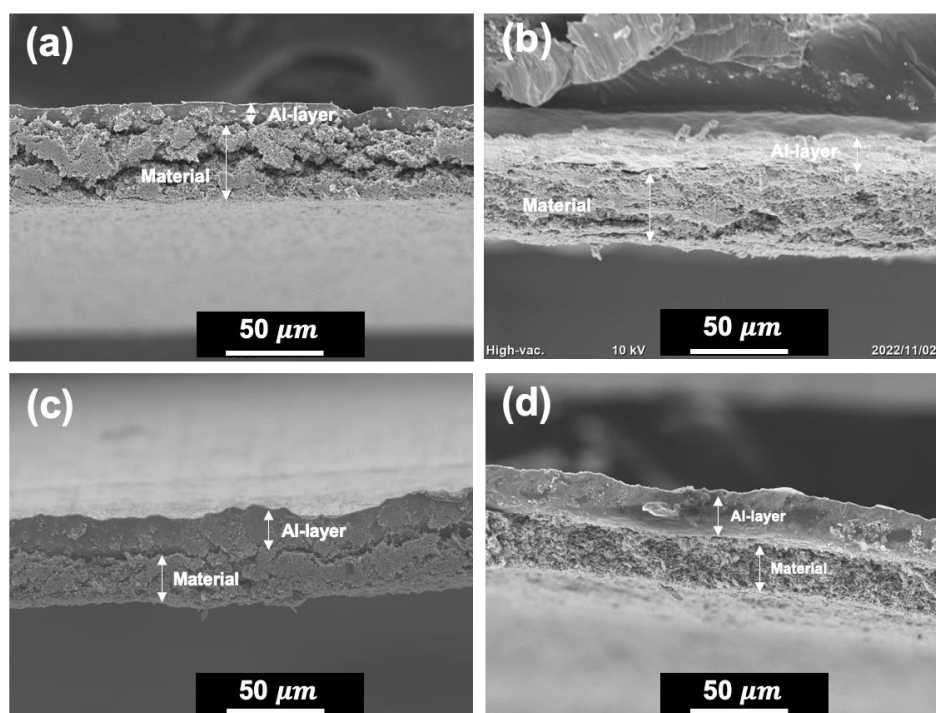

**Figure S6.** SEM images of cross-section (a) CP2:PVDF 0:100, (b) CP2:PVDF 20:80, (c) CP2:PVDF 50:50, and (d) CP2:PVDF 80:20 cathode, respectively.

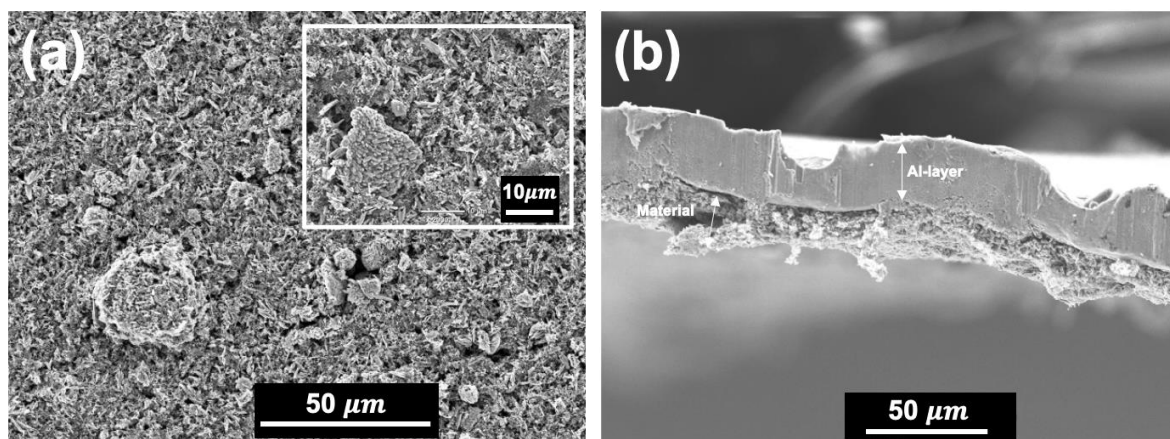

**Figure S7.** SEM images of the (a) surface side (inset: SEM images at the higher magnification for this sample) and (b) cross-section of CP2:PVDF 100:0 cathode.

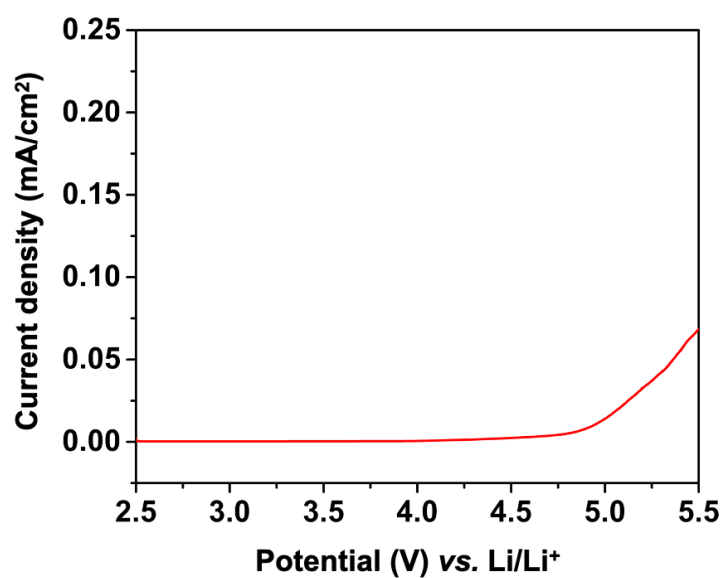

**Figure S8.** Linear sweep voltammogram of CP1 80 mol% LiFSI at 60 °C and a potential scan rate of 1 mV/s.

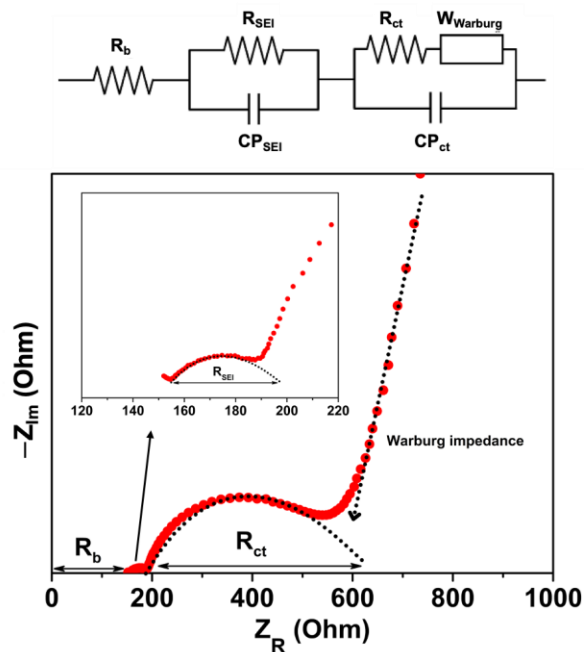

**Figure S9.** EIS analysis of Nyquist plot with an equivalent circuit model of CP2:PVDF 80:20 cathode after 10<sup>th</sup> cycle.

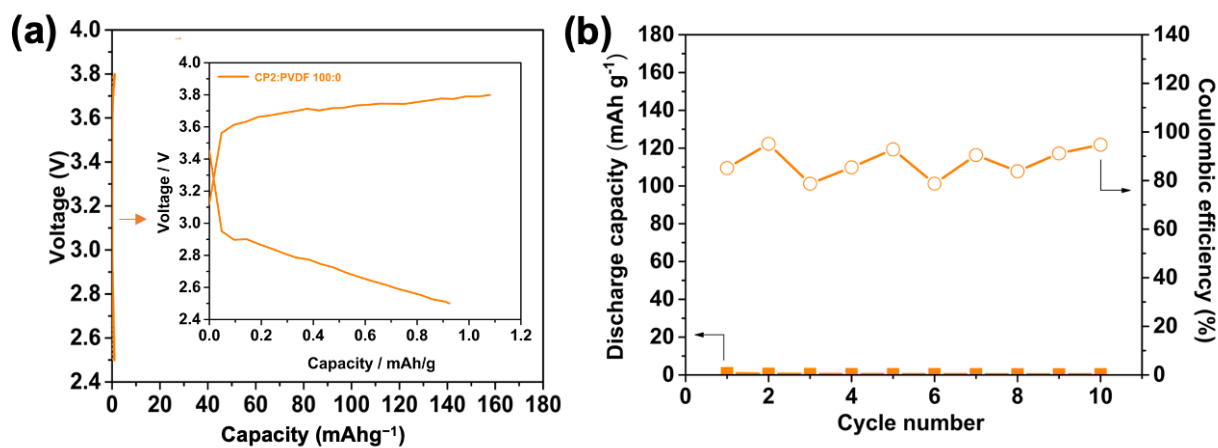

**Figure S10.** Voltage profiles of 1<sup>st</sup> charge-discharge cycle, discharge capacity, and coulombic efficiency after 10 cycles of coin cells using CP2:PVDF 100:0 cathode.

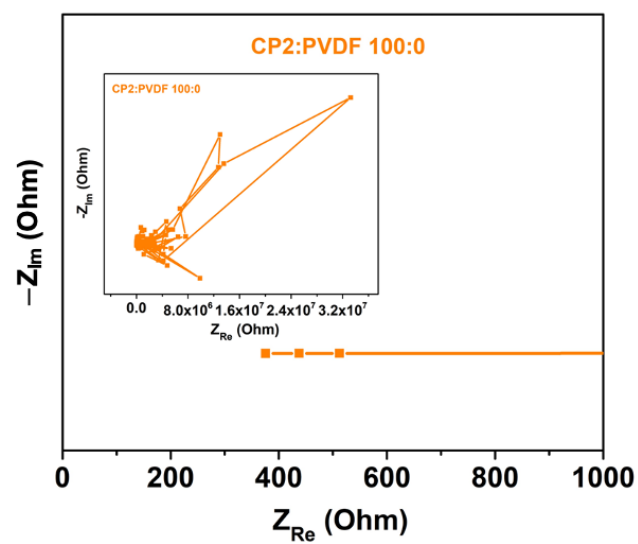

Figure S11. Nyquist plots after 1<sup>st</sup> of CP2:PVDF 100:0 cathode.
